# Supplementary material for: Practical synthesis of new and highly efficient ligands for the Suzuki reaction of aryl chlorides
Source: Royal Society of Chemistry journal article supplement (doi:10.1039/b311268n), 2003-12-19
Supplement: b311268n.doc [file b311268n.doc]

**Supporting Information**

**Practical synthesis of new and highly efficient ligands for the Suzuki reaction of aryl chlorides**

*Alexander Zapf, Ralf Jackstell, Franck Rataboul, Thomas Riermeier, Axel Monsees, Christa Fuhrmann, Nadim Shaikh, Uwe Dingerdissen, and Matthias Beller**

**General procedure for the synthesis of PAP ligands:**

In a three nacked 100 ml round bottom flask with reflux condenser *N*-arylpyrrole (10 mmol) was dissolved in 20 ml of freshly distilled *n*-hexane under argon. TMEDA (15 mmol) was added followed by *n*-BuLi (10 mmol, 1.6 M in hexane) at room temperature. The reaction mixture was refluxed for 3 h to obtain a yellow suspension. A solution of the corresponding chlorophosphine (10 mmol in 5 ml hexane) was slowly added via syringe. The mixture was further refluxed for 1h. After cooling to room temperature, degassed water (15 ml) was added and the mixture was stirred to get a clear solution. The aqueous layer was extracted with hexane (2x 15 ml) and the combined organic layers were washed with degassed water (15 ml). The solution was dried over Na2SO4 and concentrated at 45 °C to get a yellow viscous liquid which was recrystallized from methanol or toluene.

**Analytical data:**

**2-(Diphenylphosphino)-*N*-phenylpyrrole (1)**

White solid (cryst. from MeOH), m.p. 100-102 °C; yield 75 %

1H NMR (400 MHz, CDCl3): 7.24-7.13 (m, 15H), 7.00 (m, 1H), 6.24 (m, 1H), 5.98 (m, 1H); 13C NMR (101 MHz, CDCl3): 140.4 (d, 2.9 Hz), 137.5 (d, 6.7 Hz), 133.4 (d, 20.0 Hz), 128.8, 128.7, 128.5, 128.3 (d, 7.6 Hz), 127.3, 126.6 (d, 1.9 Hz), 126.2 (d, 4.8 Hz), 119.9 (d, 1.9 Hz), 109.8; 31P NMR (162 MHz, CDCl3): -29.8; IR (KBr): 3068, 3050, 1596, 1494, 1435, 1321, 1086, 773, 748, 725, 692, 515, 500 cm-1; MS (EI, 70 eV): 327 (100 %, M+), 250 (12 %), 219 (11 %), 183 (8 %), 172 (53 %), 145 (5 %), 115 (7 %), 77 (14 %), 51 (10 %); HRMS: calcd. for C22H18NP: 327.11768, found: 327.11698.

**2-(Dicyclohexylphosphino)-*N*-phenylpyrrole (2)**

White solid (cryst. from MeOH), m.p. 91-93 °C; yield 82 %

1H NMR (400 MHz, C6D6): 7.74 (m, 2H), 7.52 (m, 2H), 7.42 (m, 1H), 7.35 (m, 1H), 7.06 (dd, 3.7 Hz, 1.7 Hz, 1H), 6.90 (dd, 3.6 Hz, 2.6 Hz, 1H), 2.26-1.96 (m, 12H), 1.69-1.47 (m, 10H); 13C NMR (101 MHz, C6D6): 141.6 (d, 1.9 Hz), 128.5, 128.4, 128.2, 127.1, 126.2 (d, 1.9 Hz), 117.7 (d, 3.8 Hz), 109.9, 34.8 (d, 10.5 Hz), 30.8 (d, 17.2 Hz), 29.4 (d, 7.6 Hz), 27.4 (d, 12.4 Hz), 27.4 (d, 6.7 Hz), 26.8; 31P NMR (162 MHz, C6D6): -28.2; IR (KBr): 2925, 2847, 1595, 1496, 1446, 1419, 1319, 760, 715, 696 cm-1; MS (EI, 70 eV): 339 (30 %, M+), 257 (38 %), 174 (100 %), 143 (6 %), 77 (7 %), 55 (15 %), 41 (14 %); HRMS: calcd. for C22H30NP: 339.21158, found: 339.21166.

**2-(Di-*tert*-butylphosphino)-*N*-phenylpyrrole (3)**

White solid (cryst. from MeOH), m.p. 51-53 °C; yield 76 %

1H NMR (400 MHz, CDCl3): 7.80-7.65 (m, 3H), 7.60-7.50 (m, 2H), 7.30 (m, 1H), 7.10 (dd, 1.6 Hz, 3.6 Hz, 1H), 6.60 (m, 1H), 1.50 (d, 12.1 Hz, 18H); 13C NMR (101 MHz, CDCl3): 141.6 (d, 1.9 Hz), 128.8 (d, 12.4 Hz), 128.3, 128.2, 127.3, 125.9 (d, 1.9 Hz), 118.3 (d, 4.8 Hz), 108.5, 33.0 (d, 17.2 Hz), 30.3 (d, 14.3 Hz); 31P NMR (162 MHz, CDCl3): 3.64; IR (KBr): 2881, 1498, 1458, 1378, 1362, 1320, 762, 722, 694 cm-1; MS (EI, 70 eV): 287 (22 %, M+), 230 (18 %), 174 (100 %), 77 (8 %), 57 (20 %), 41 (20 %); HRMS: calcd. for C18H26NP: 287.18030, found: 287.18010.

**2-(Di-1-adamantylphosphino)-*N*-phenylpyrrole (4)**

White solid (cryst. from toluene); yield 85 %

1H NMR (400 MHz, CDCl3): 7.91-7.81 (m, 3H), 7.75-7.72 (m, 2H), 7.47 (m, 1H), 7.21 (dd, 1.6 Hz, 3.6 Hz, 1H), 6.86 (dd, 2.8 Hz, 3.6 Hz, 1H), 2.43-2.34 (m, 12H)))), 2.30-2.26 (m, 6H), 2.13 (m, 12H); 13C NMR (101 MHz, CDCl3): 141.6 (d, 1.9 Hz), 128.3 (d, 3.8 Hz), 128.2, 127.3, 126.1, 125.9 (d, 1.9 Hz), 119.4 (d, 5.7 Hz), 108.3, 41.4 (d, 11.4 Hz), 37.5 (d, 17.2 Hz), 36.9, 28.9 (d, 9.5 Hz); 31P NMR (162 MHz, CDCl3): 4.58; IR (KBr): 2901, 2846, 1598, 1497, 1448, 1319, 1086, 765, 730, 698, 504 cm-1; MS (EI, 70 eV): 443 (64 %, M+), 308 (13 %), 172 (13 %), 135 (100 %), 93 (17 %), 79 (18 %); HRMS: calcd. for C30H38NP: 443.27420, found: 443.27175.

**2-(Dicyclohexylphosphino)-*N*-(2-methoxyphenyl)pyrrole (5)**

Light brown solid (cryst. from MeOH), m.p. 93-95 °C; yield 15 %

1H NMR (400 MHz, C6D6): 7.32 (m, 1H), 7.16 (m, 1H), 7.01 (m, 1H), 6.88 (m, 1H), 6.72 (dd, 1.6 Hz, 3.6 Hz, 1H), 6.61 (m, 2H), 3.31 (s, 3H), 1.99-1.68 (m, 12H), 1.41-1.20 (m, 10H); 13C NMR (101 MHz, C6D6): 136.3, 131.1 (d, 1.9 Hz), 131.0 (d, 2.9 Hz), 129.3, 126.7, 120.3, 117.1, 116.6 (d, 4.8 Hz), 111.8, 109.8, 55.1, 34.9 (d, 10.5 Hz), 30.9 (d, 17.2 Hz), 29.6 (d, 7.6 Hz), 27.8 (d, 9.5 Hz), 27.7 (d, 3.8 Hz), 27.3; 31P NMR (162 MHz, C6D6): -26.8; IR (KBr): 2928, 2848, 1598, 1505, 1279, 1245, 1084, 1048, 850, 755, 714, 620, 492 cm-1; MS (EI, 70 eV): 369 (3 %, M+), 338 (100 %), 256 (8 %), 204 (37 %), 55 (14 %). HRMS: calcd. for C23H32NOP: 369.22217, found: 369.21736.

**2-(Dicyclohexylphosphino)-*N*-naphthylpyrrole (6)**

White solid (cryst. from MeOH), m.p. 107-109 °C; yield 15 %

1H NMR (400 MHz, CDCl3): 8.16 (t, 7.6 Hz, 2H), 7.76 (m, 4H), 7.49 (m, 1H), 7.28 (m, 1H), 6.87 (dd, 1.6 Hz, 3.6 Hz, 1H), 6.74, (m, 1H), 2.00-1.73 (m, 12H), 1.54-1.16 (m, 10H); 13C NMR (101 MHz, C6D6): 138.3 (d, 1.9 Hz), 134.2, 132.4 (d, 1.9 Hz), 130.3, 130.2, 129.1, 128.3, 125.6, 127.0, 126.8, 125.1, 124.2, 116.8 (d, 3.8 Hz), 109.3, 34.75 (d, 9.5 Hz), 33.9 (d, 6.7 Hz), 31.0 (d, 16.2 Hz), 30.3 (d, 16.2 Hz), 29.8 (d, 9.5 Hz), 28.9 (d, 3.8 Hz), 27.8, 27.7, 27.6 (d, 2.9 Hz), 27.5 (d, 3.9 Hz), 27.4, 26.9; 31P NMR (162 MHz, C6D6): -26.5; IR (KBr): 3051, 2922, 2848, 1596, 1509, 1446, 1425, 1307, 1203, 800, 774, 716, 491 cm-1; MS (EI, 70 eV): 389 (71 %, M+), 307 (43 %), 224 (100 %), 55 (16 %). HRMS: calcd. for C26H32NP: 389.22723, found: 389.22754.

**General procedure for the Suzuki coupling of aryl chlorides:**

3.0 mmol aryl chloride, 4.5 mmol phenylboronic acid and 6.0 mmol potassium triphosphate were added to 6 ml of dry toluene under argon. PAP ligand and Pd(OAc)2 were added (from a stock solution in toluene) and the suspension was stirred for 20 h at 60 °C (or a different temperature). After cooling to room temperature 10 ml diethyl ether and 10 ml sodium hydroxide solution (1 M) were added. The organic phase was analyzed by GC after addition of hexadecane (100 l) as internal standard. All products were identified by comparison of their GC/MS data with the data of known authentic samples.
